# Supplementary material
Source: publisher site journal article supplement (https://www.dovepress.com/article/341314)
Supplement: Supplementary file 1 [file get_supplementary_file.php]

**Supplementary figures:**


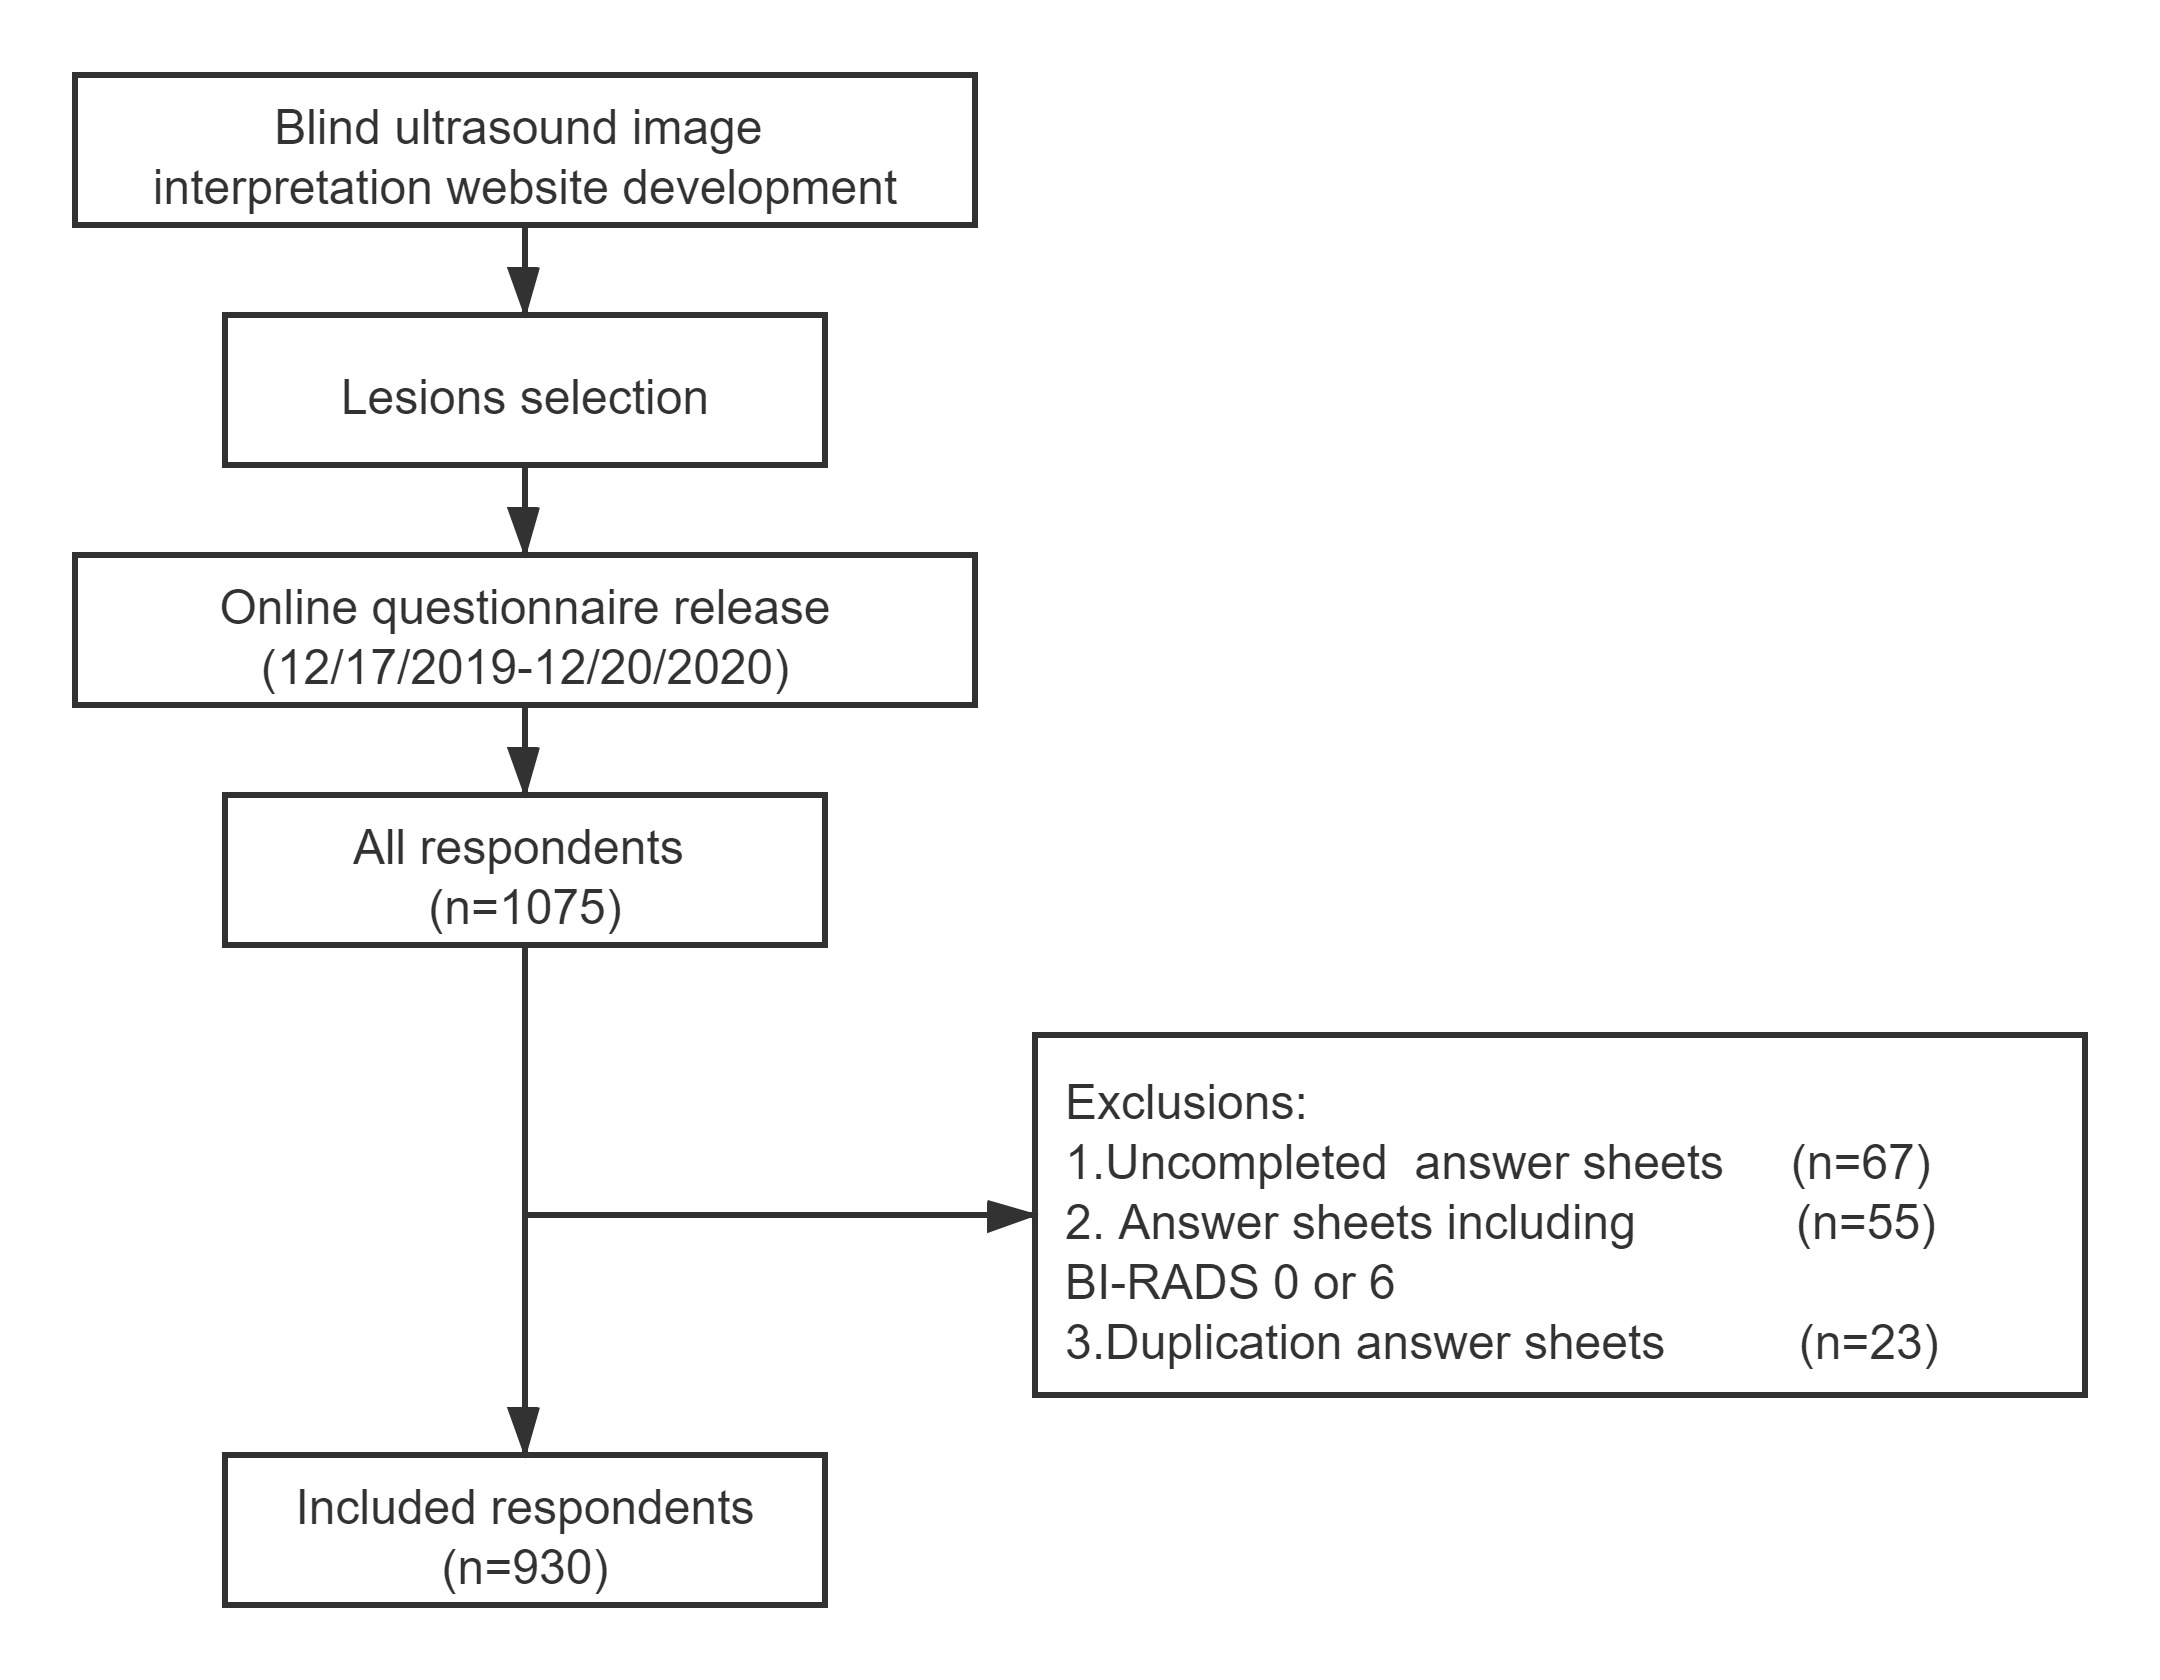


**Figure S1：**Flow chart of the survey


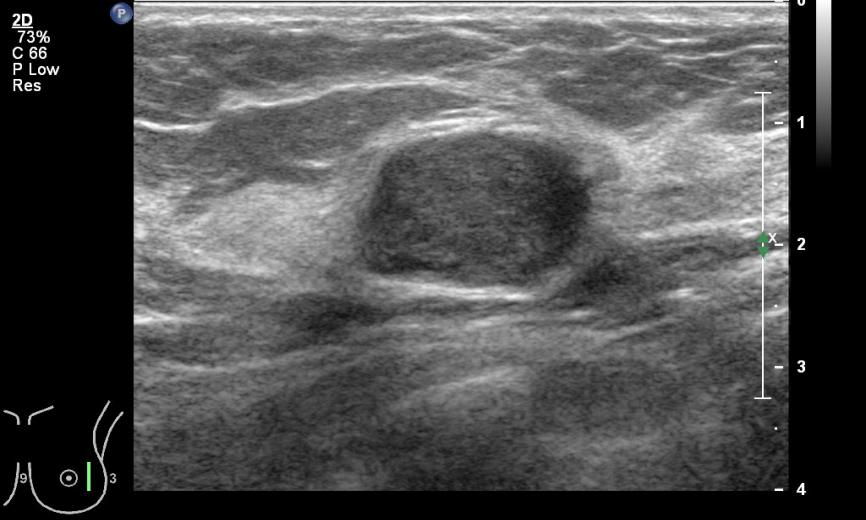


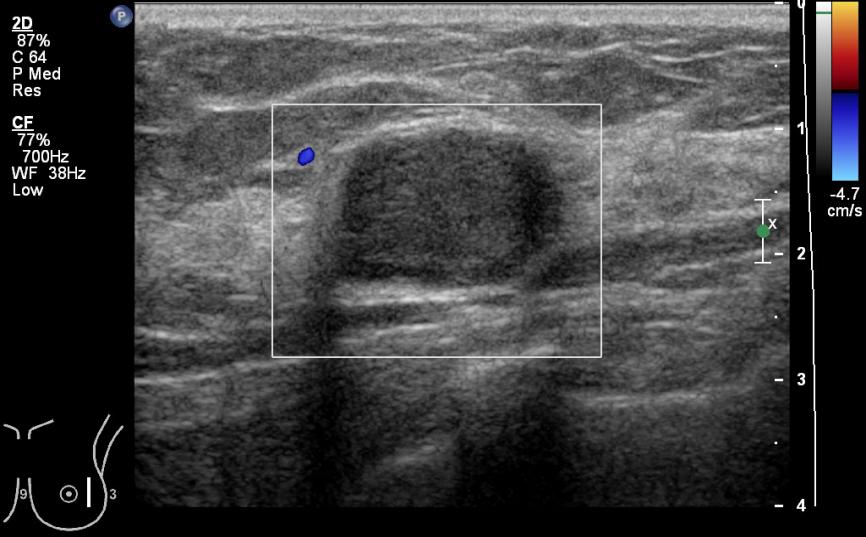


**Figure S2：**Ultrasound B-mode and Color Doppler Flow images of lesion 1.


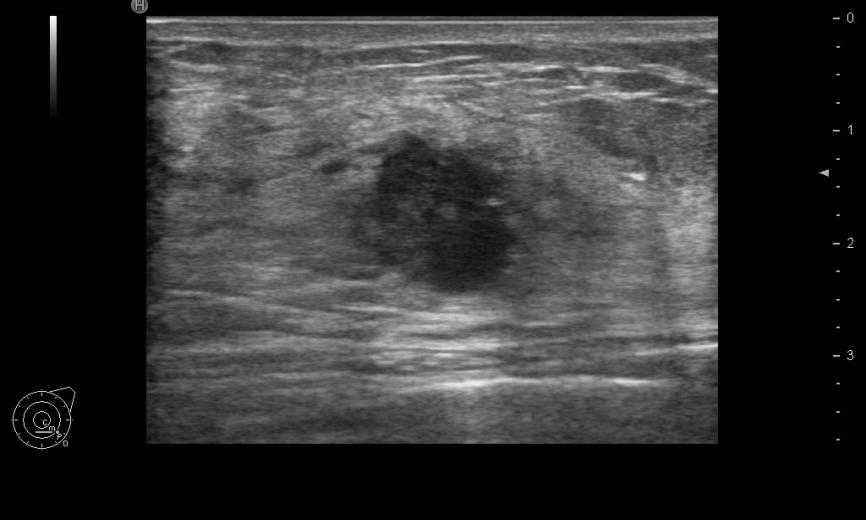


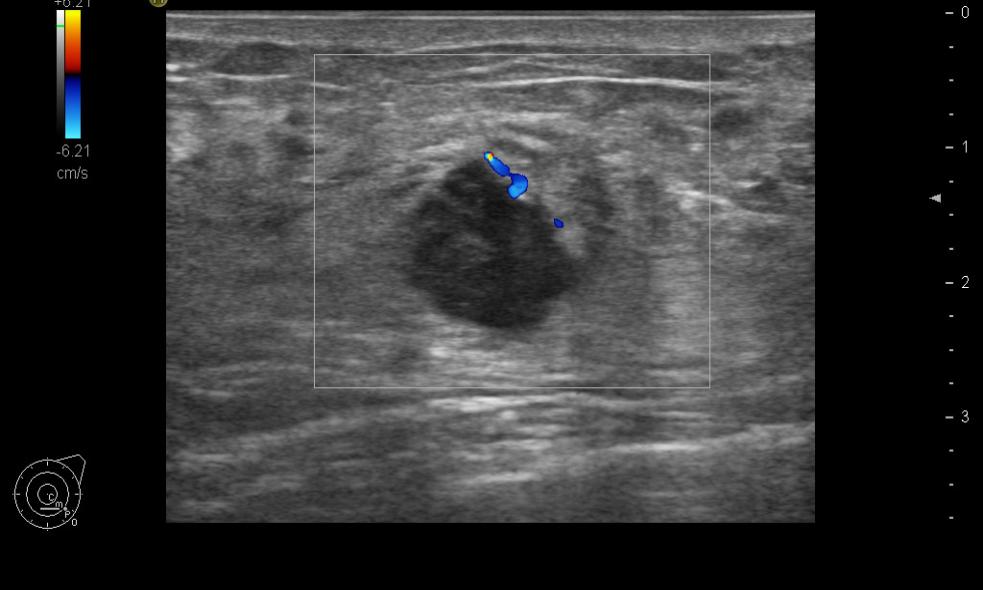


**Figure S3：**Ultrasound B-mode and Color Doppler Flow images of lesion 2.


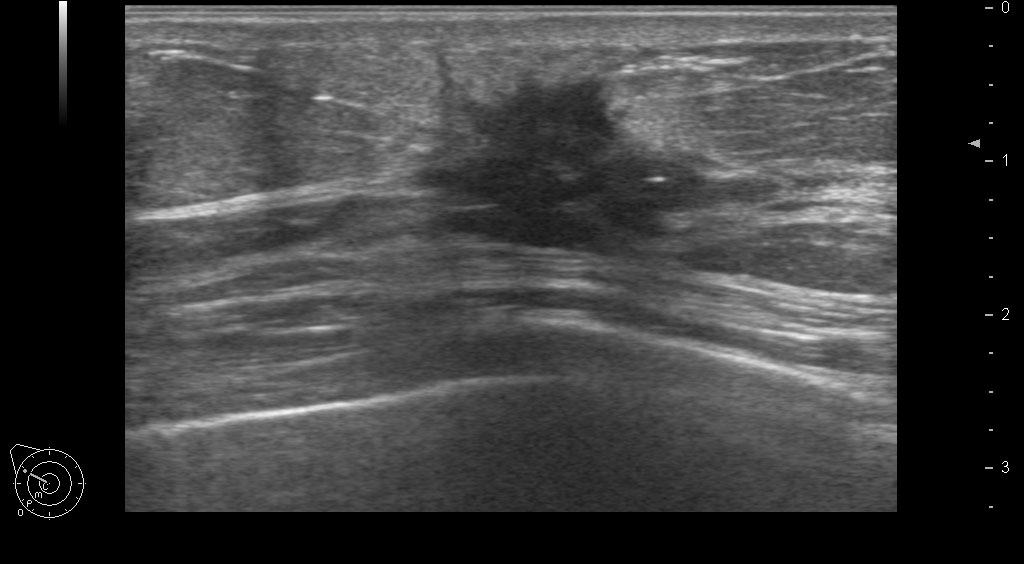

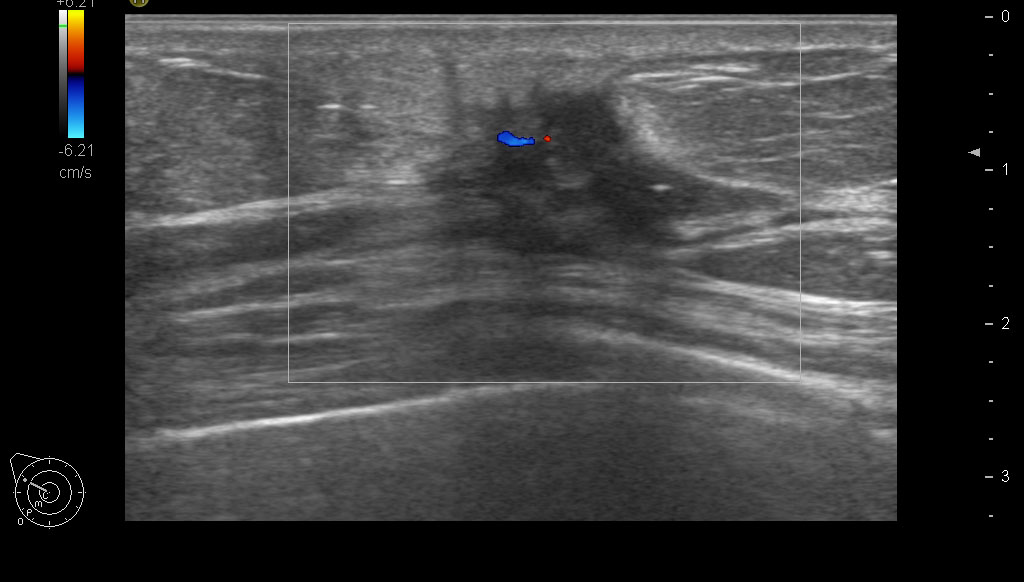


**Figure S4：**Ultrasound B-mode and Color Doppler Flow images of lesion 3.


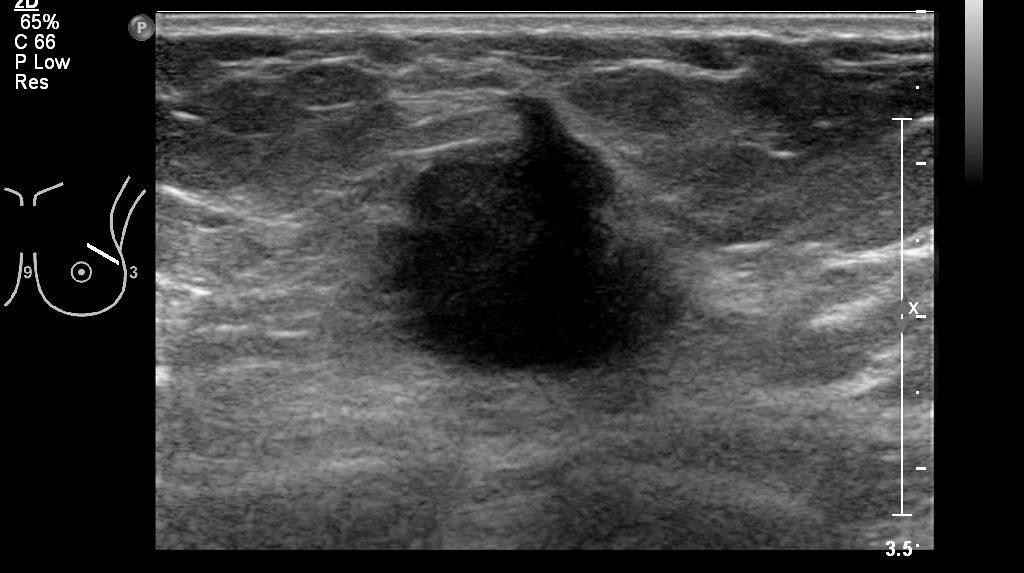

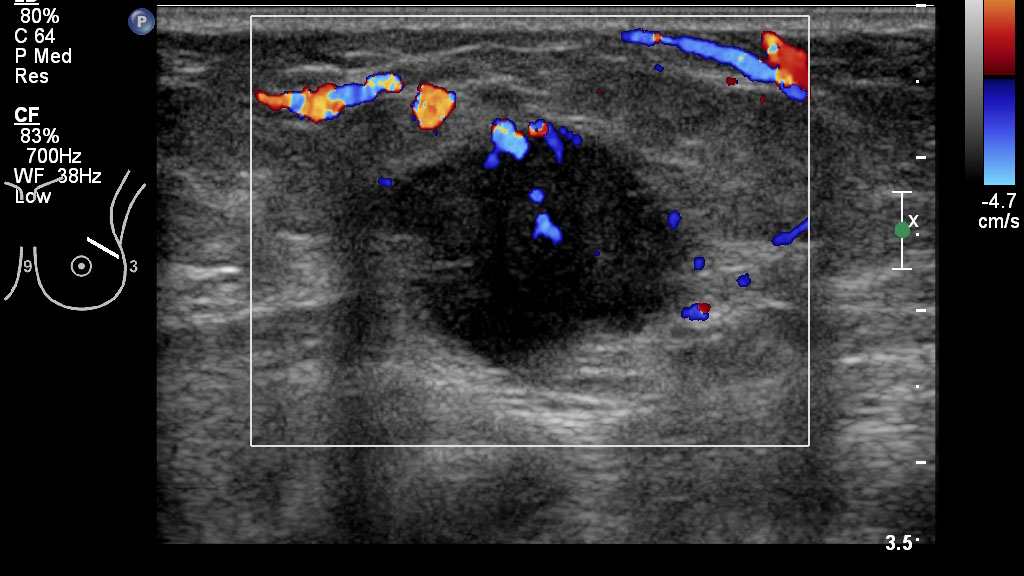


**Figure S5：**Ultrasound B-mode and Color Doppler Flow images of lesion 4.


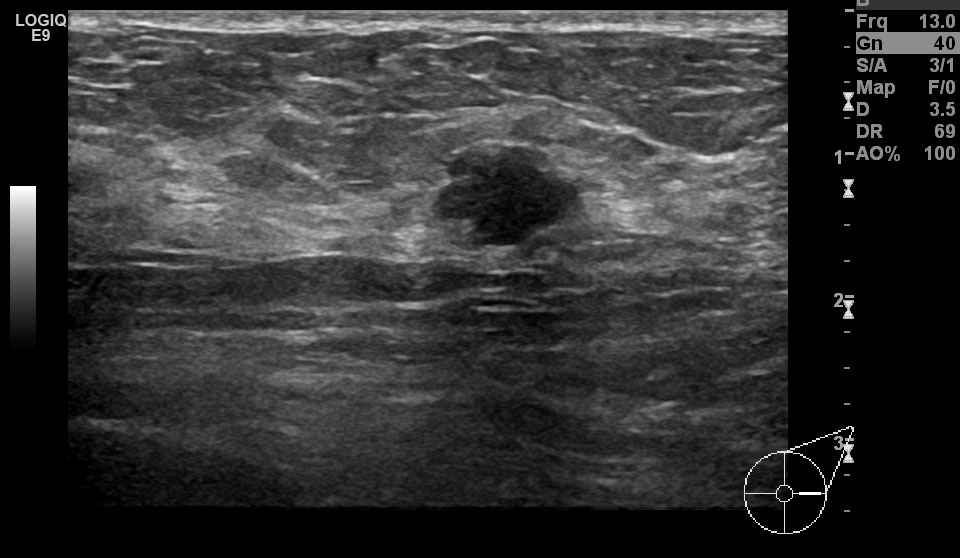

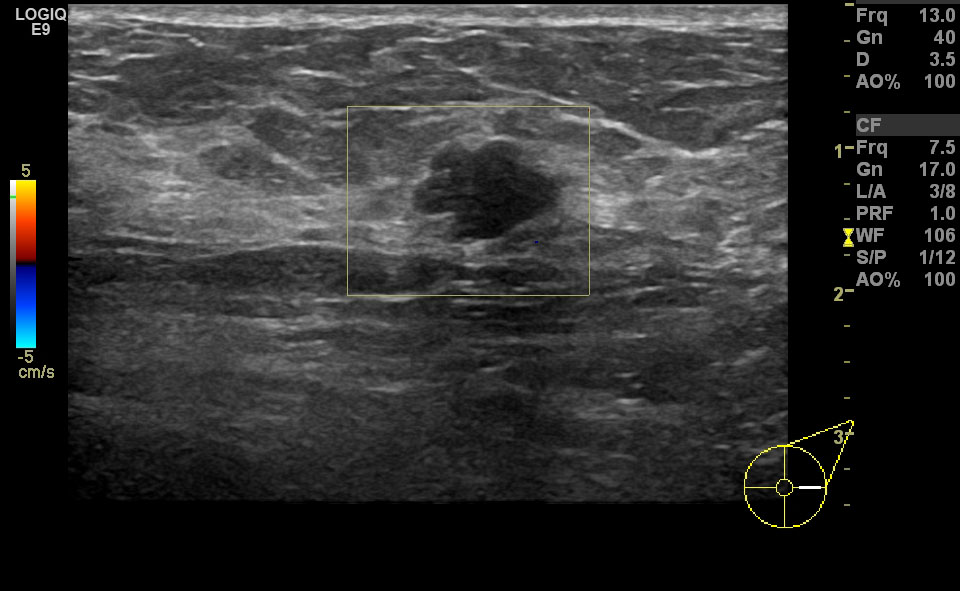


**Figure S6：**Ultrasound B-mode and Color Doppler Flow images of lesion 5.


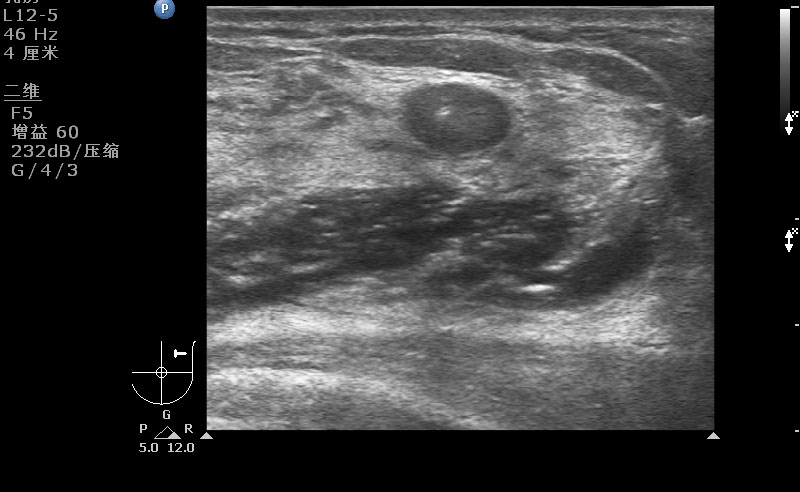


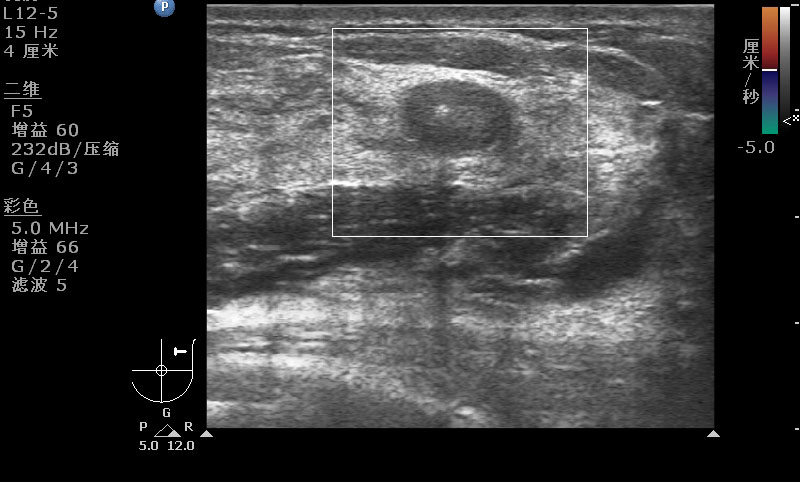


**Figure S7：**Ultrasound B-mode and Color Doppler Flow images of lesion 6.


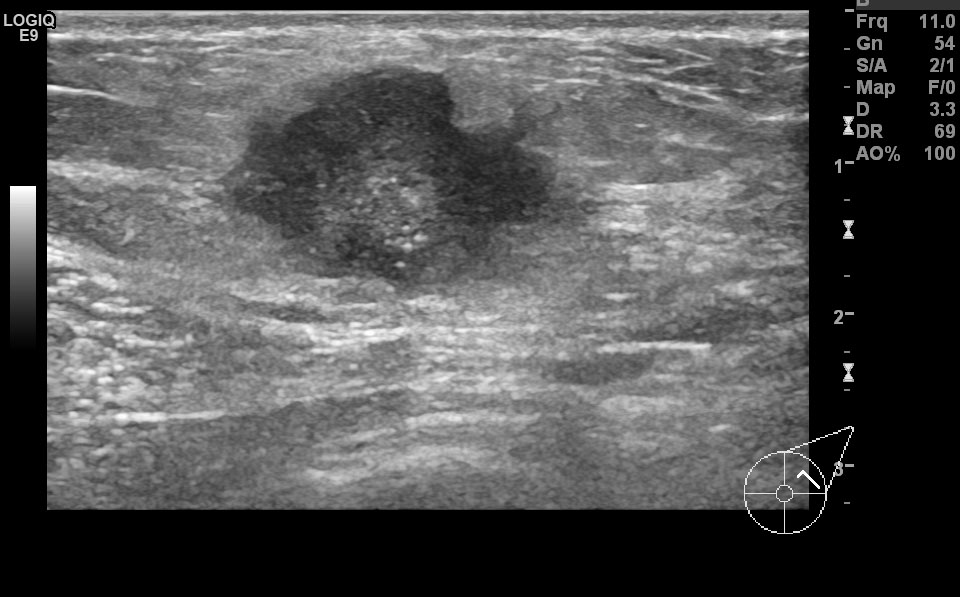


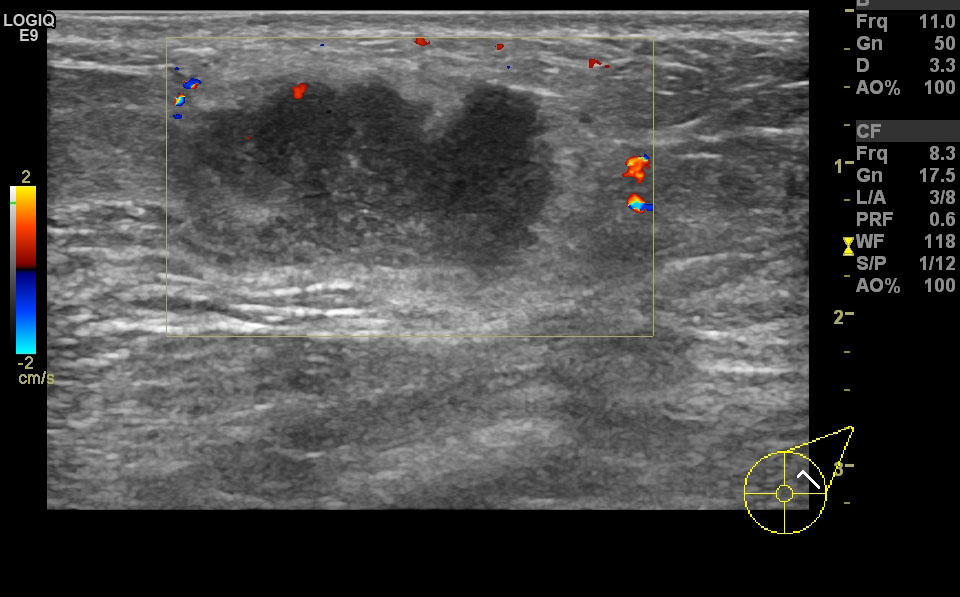


**Figure S8：**Ultrasound B-mode and Color Doppler Flow images of lesion 7.


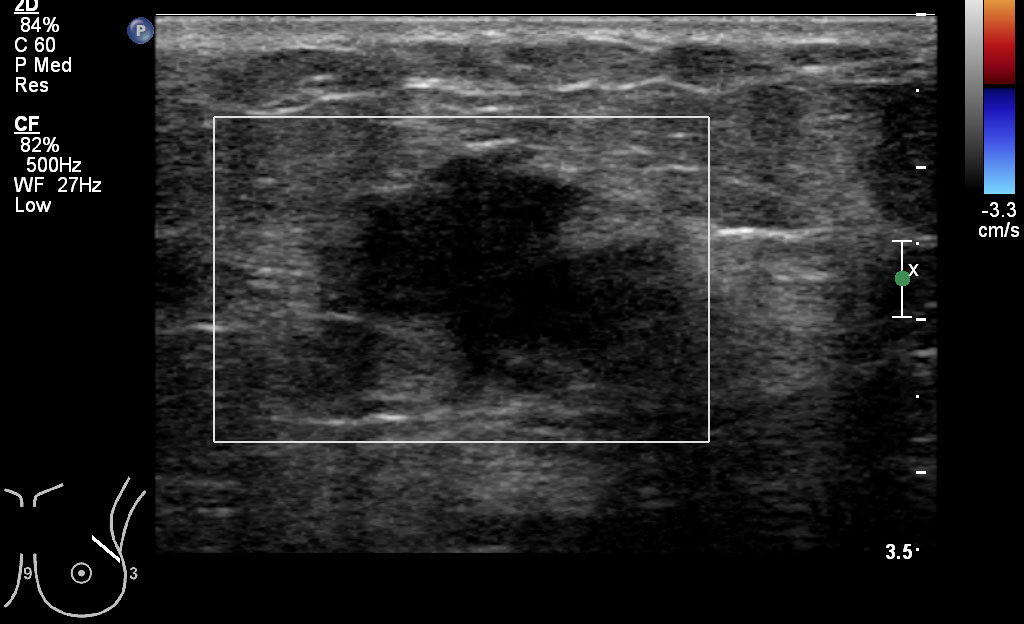

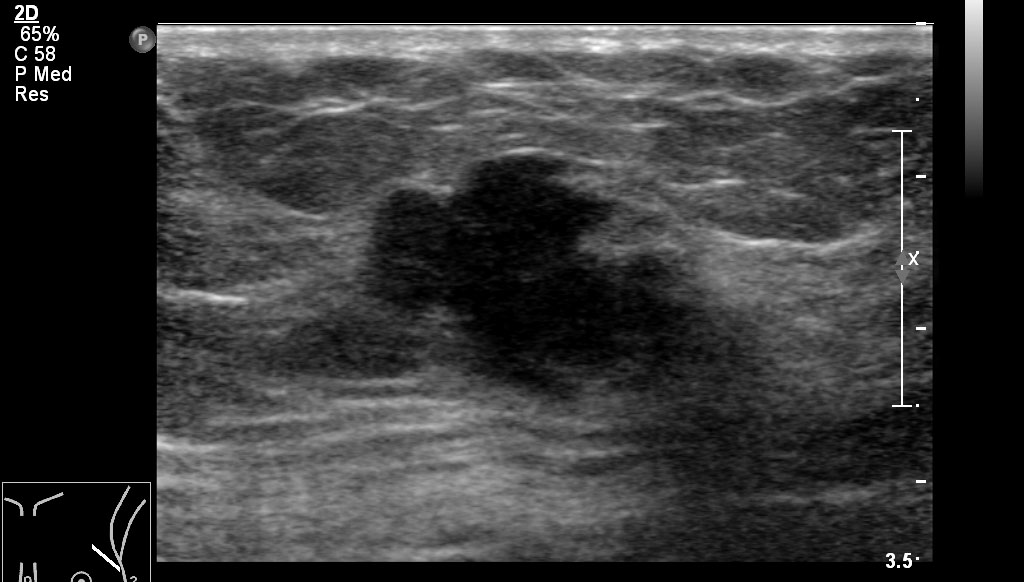


**Figure S9：**Ultrasound B-mode and Color Doppler Flow images of lesion 8.


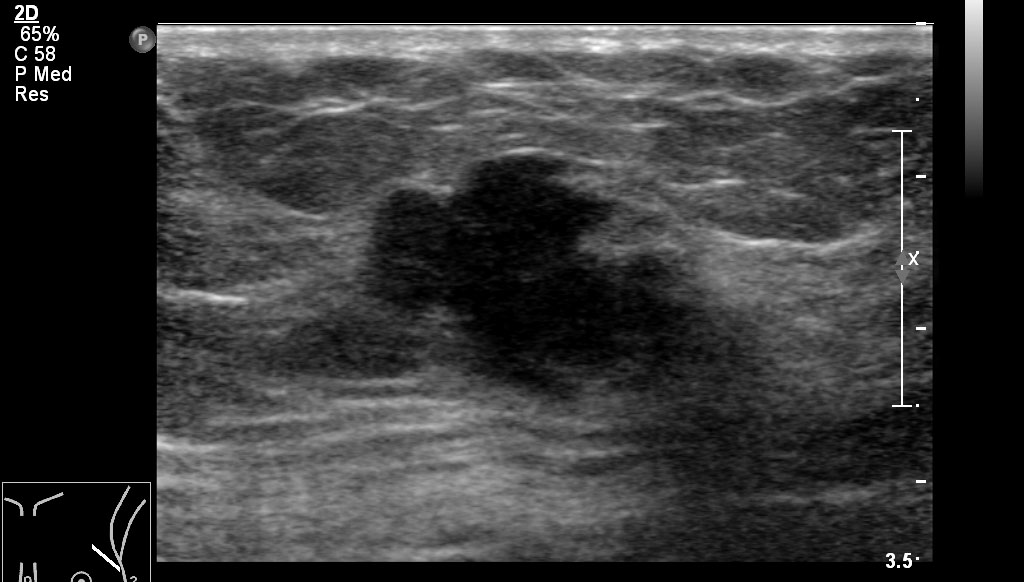


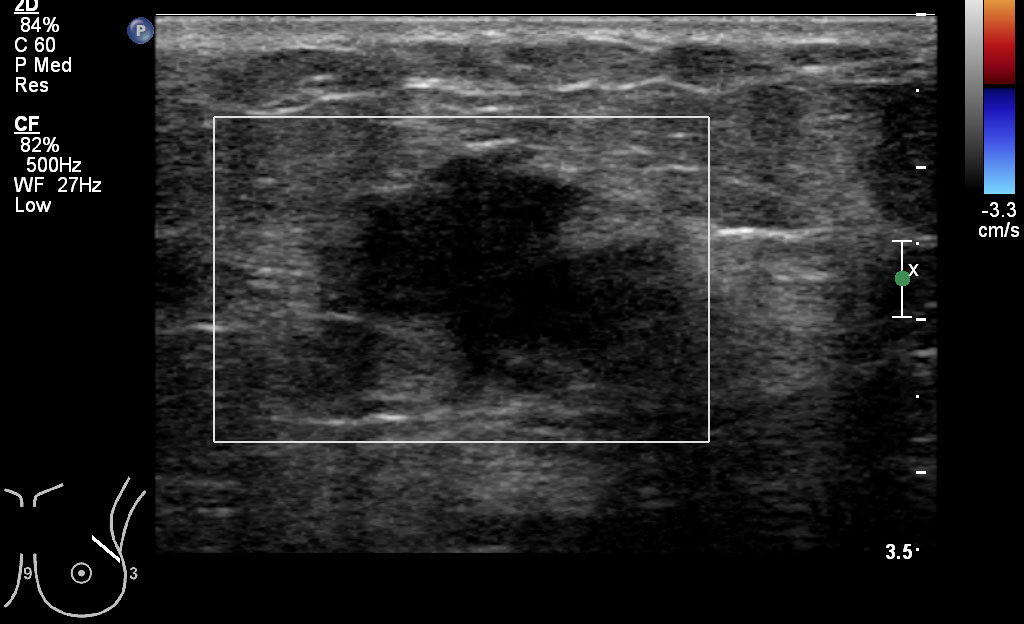


**Figure S10：**Ultrasound B-mode and Color Doppler Flow images of lesion 9.


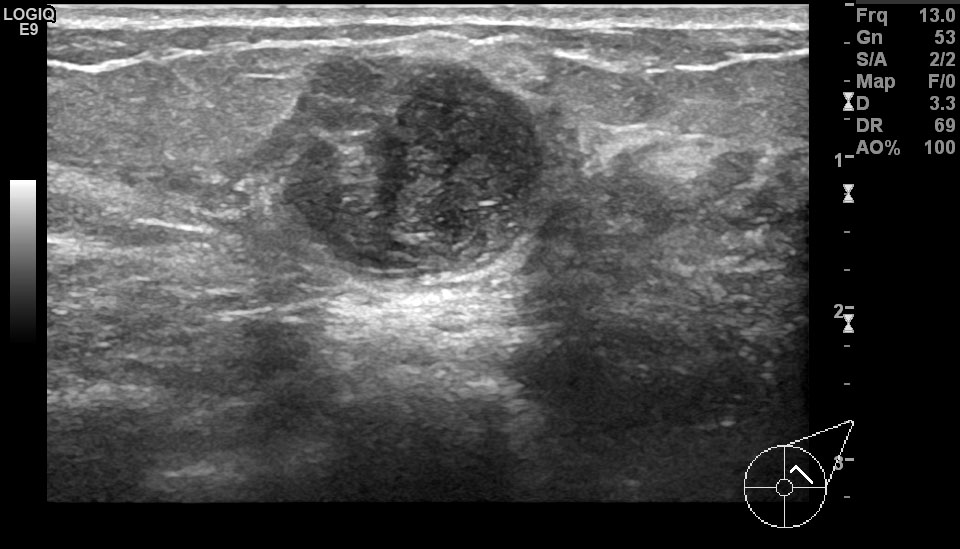


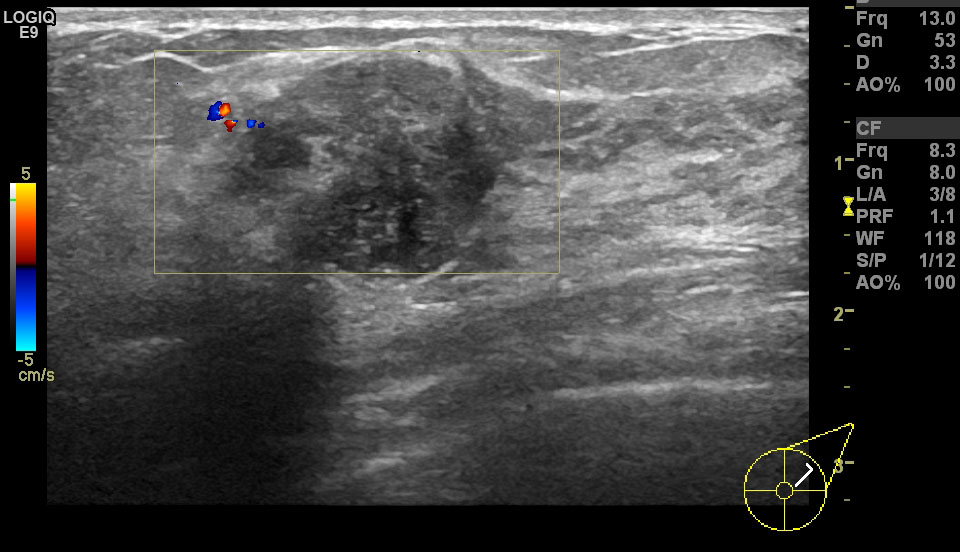


**Figure S11：**Ultrasound B-mode and Color Doppler Flow images of lesion 10.
